# Supplementary material for: Mixing state of refractory black carbon at different atmospheres in China
Source: Copernicus journal article supplement (doi:10.5194/acp-2022-105), 2022-02-25
Supplement: Supplementary file 1 [file acp-2022-105-supplement.pdf]

1 Supplementary for

2 **Mixing state of refractory black carbon at different atmospheres in China**

3 Gang Zhao<sup>1</sup>, Tianyi Tan<sup>1</sup>, Shuya Hu<sup>1</sup>, Zhuofei Du<sup>1</sup>, Dongjie Shang<sup>1</sup>, Zhijun Wu<sup>1</sup>, Song Guo<sup>1</sup>,  
4 Jing Zheng<sup>1</sup>, Wenfei Zhu<sup>1</sup>, Mengren Li<sup>1</sup>, Limin Zeng<sup>1</sup>, Min Hu<sup>1\*</sup>

5 1 State Key Joint Laboratory of Environmental Simulation and Pollution Control,  
6 International Joint Laboratory for Regional Pollution Control, Ministry of Education,  
7 College of Environmental Sciences and Engineering, Peking University, Beijing, 100871,  
8 China

9 **\*Correspondence author:** Min Hu (minhu@pku.edu.cn)

10

11

12

13 **1 Measurement site.**

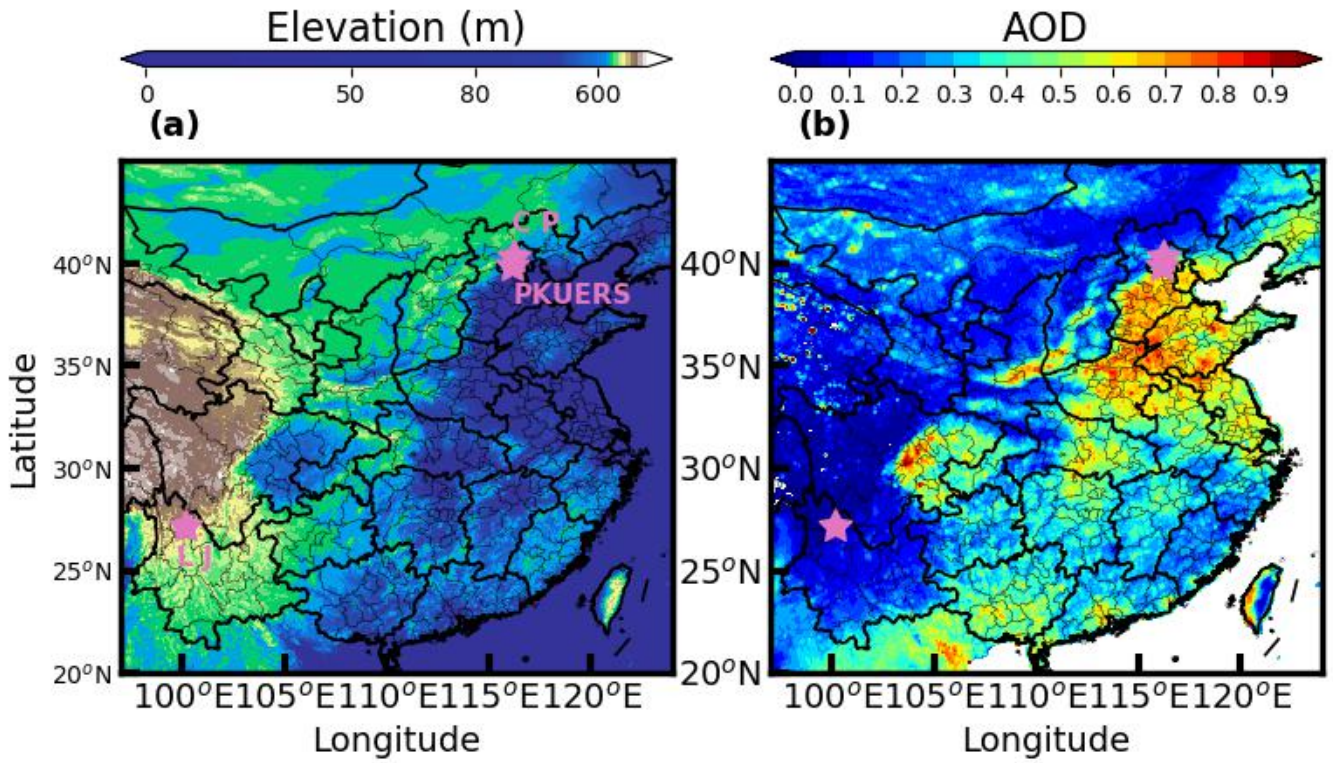

14

15 **Figure S1:** Measurement site of PKUERS, CP, and LJ (marked with stars). Filled colors represent (a) the  
16 topography of the Jianghuai Plain. (b) the average aerosol optical depth at 550nm during the year of 2020  
17 from Moderate Resolution Imaging Spectroradiometer onboard satellite Aqua.

18

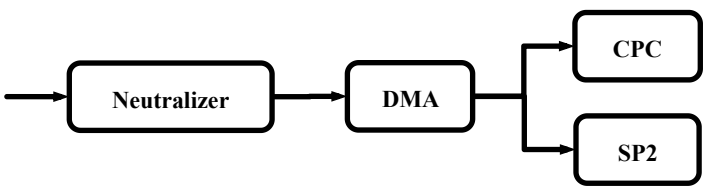

20 **Figure S2.** Schematic of the instrument setup for measuring the ambient aerosol RRI.

21

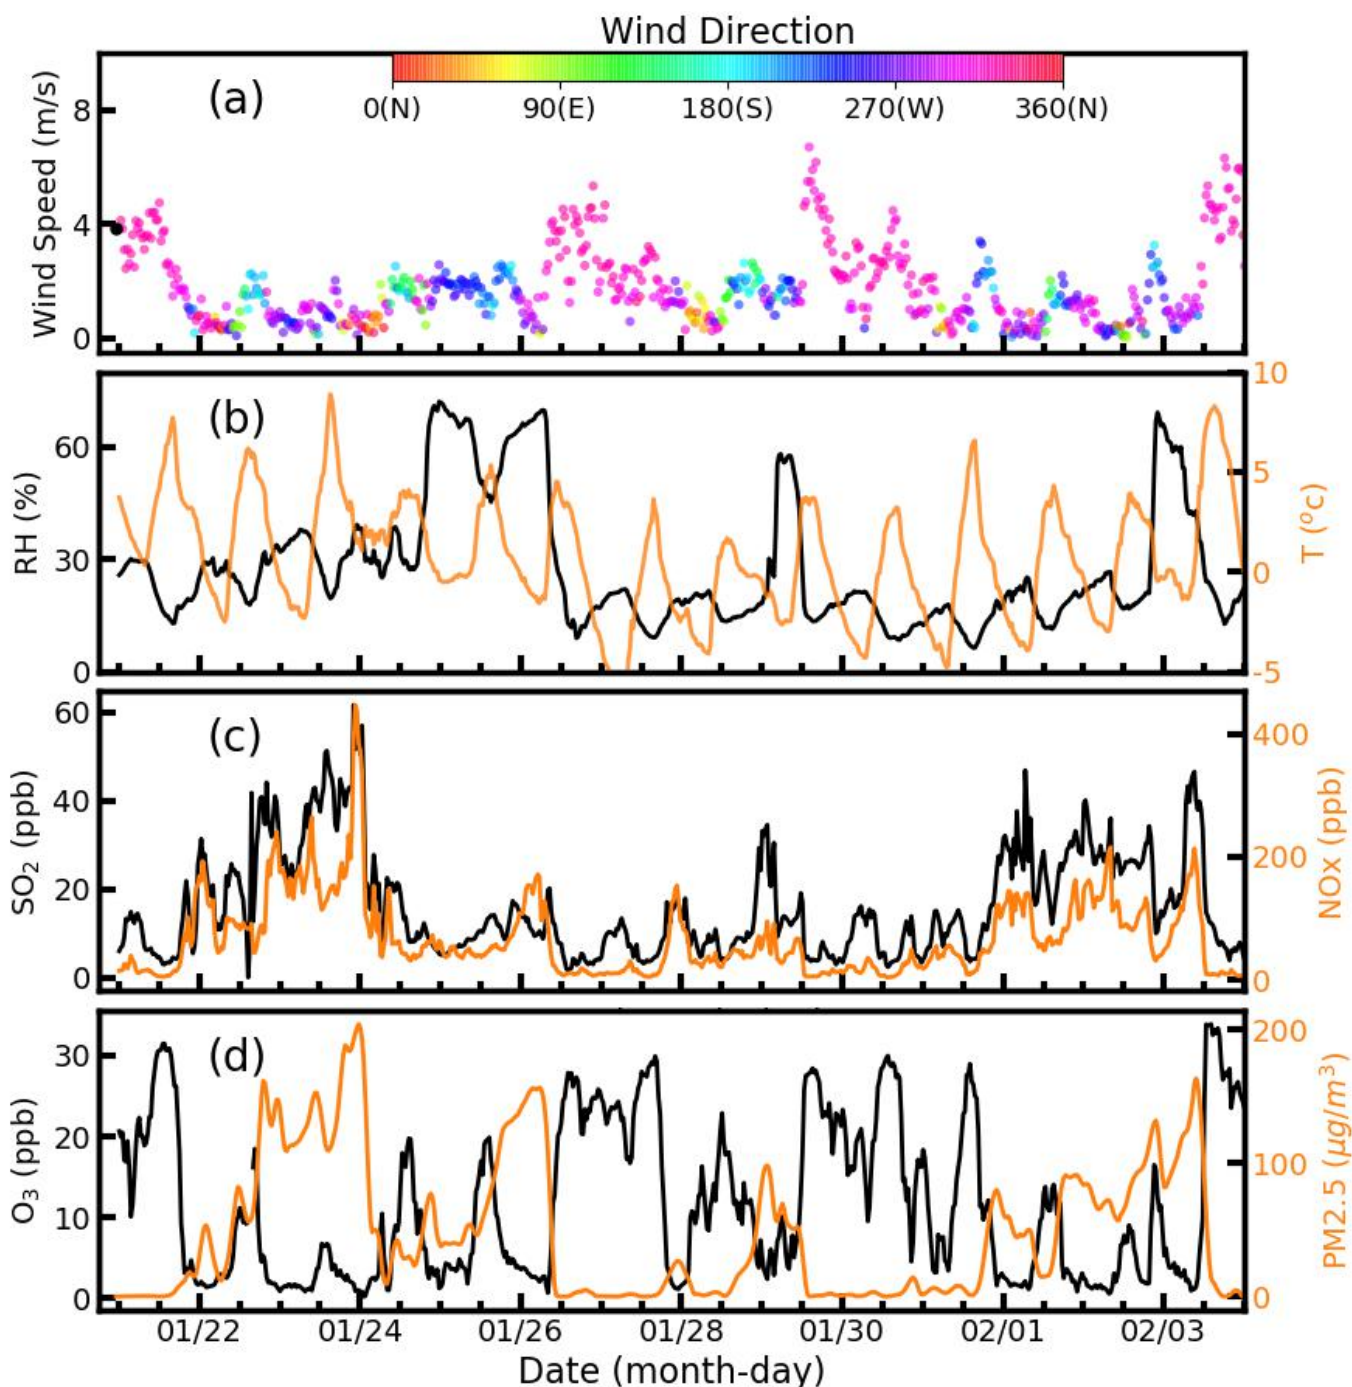

23

24 **Figure. S3.** The time series of (a) wind speed, (b) RH (in black), and T (in orange), (c) chemical  
 25 compositions of organic compositions (green), nitrate (blue), sulfate (red), ammonium (orange), and chlorine  
 26 (purple), (d) SO<sub>2</sub> (black) and NO<sub>x</sub> (orange), and (3) O<sub>3</sub> (black) and PM<sub>2.5</sub> (orange) during the measurement  
 27 conducted at PKU. The filled colors in the panel (a) represent the wind directions.

28

29 **4 Overview of the measurement results for the CP site.**

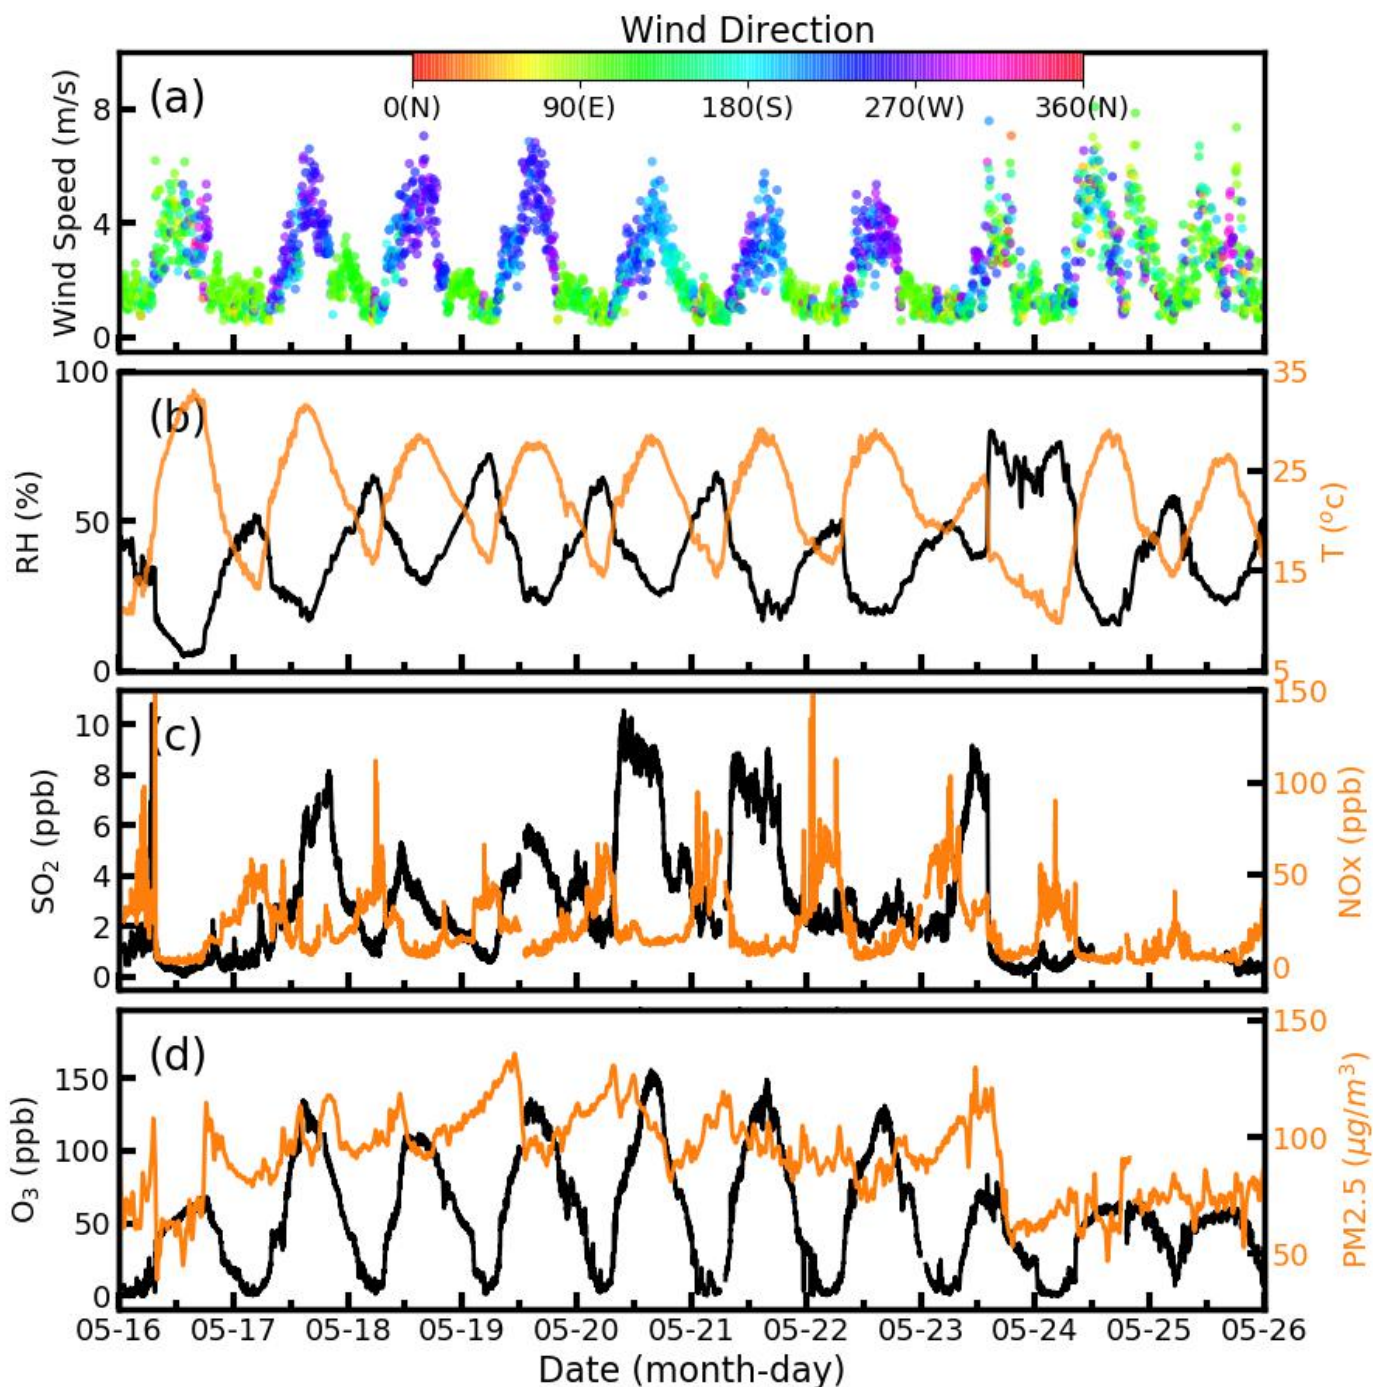

32 **Figure. S4.** The time series of (a) the wind speed, (b) RH (in black), and T (in orange), (c) chemical  
33 compositions of organic compositions (green), nitrate (blue), sulfate (red), ammonium (orange), and chlorine  
34 (purple), (d) SO<sub>2</sub> (black) and NO<sub>x</sub> (orange), and (3) O<sub>3</sub> (black) and PM<sub>2.5</sub> (orange) during the measurement  
35 conducted at CP. The filled colors in the panel (a) represent the wind directions.  
36



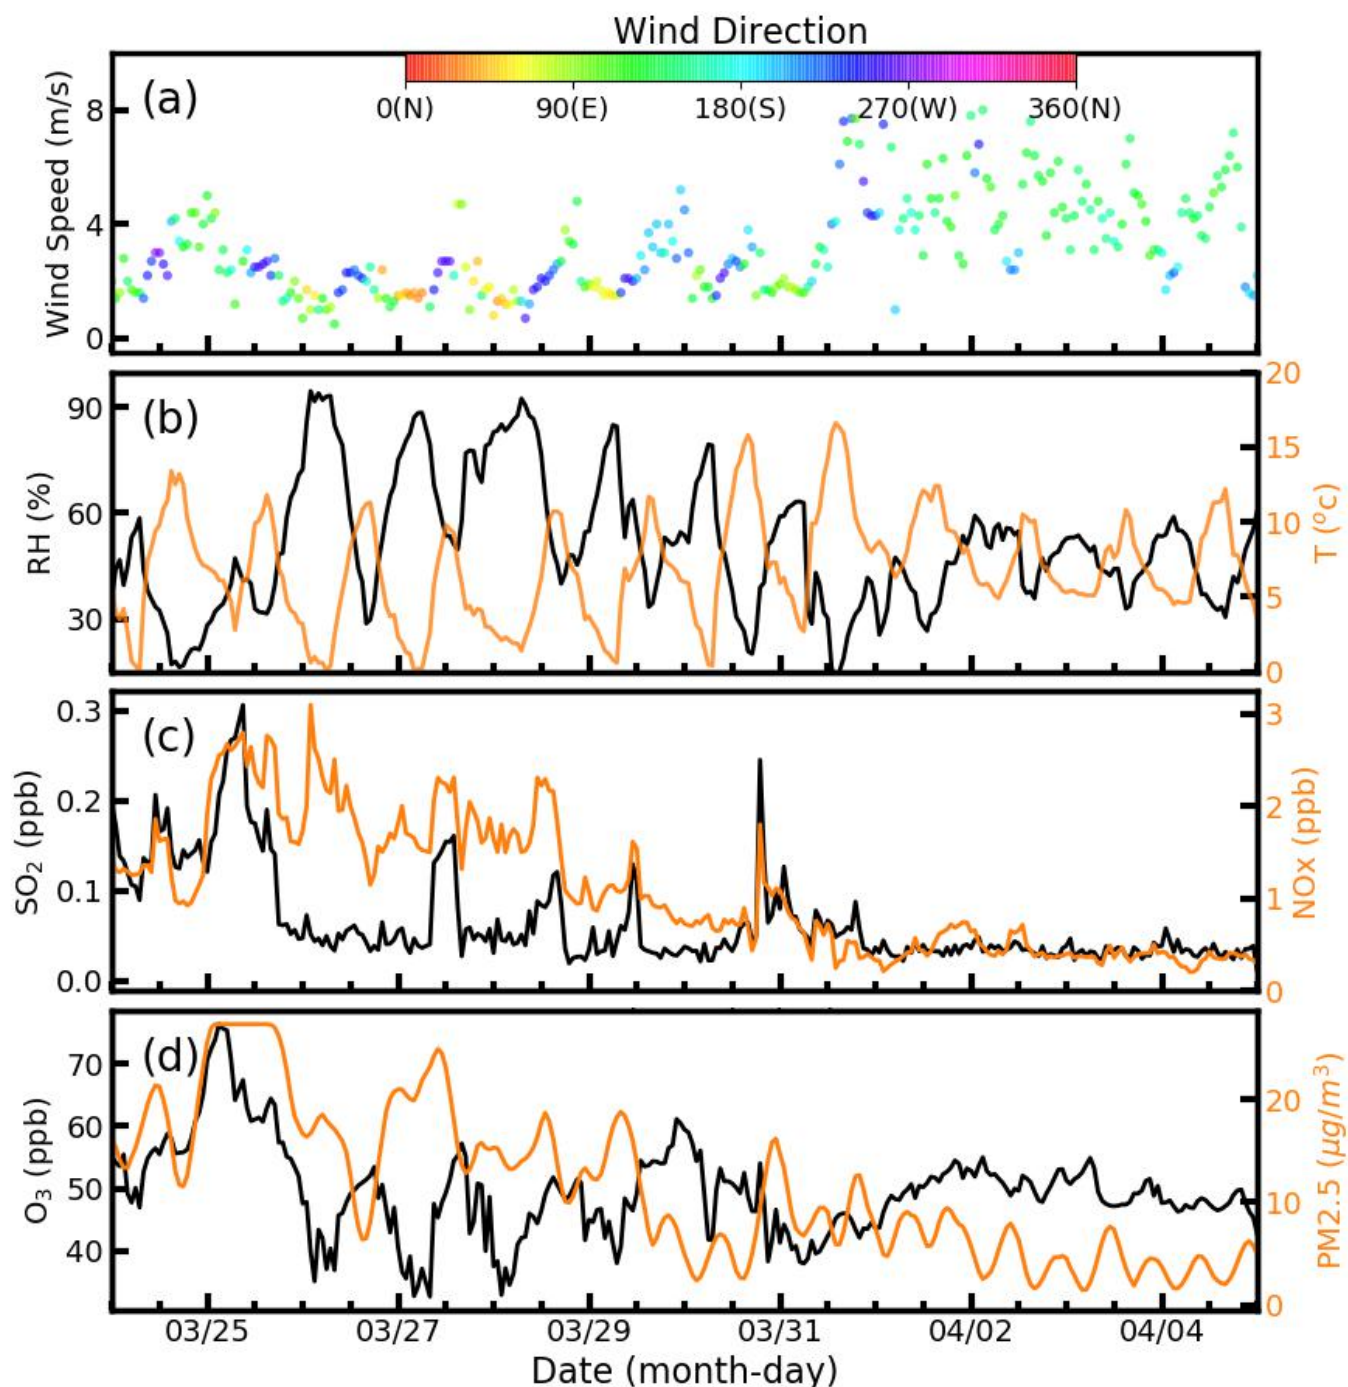

40

41 **Figure. S5.** The time series of (a) wind speed, (b) RH (in black), and T (in orange), (c) chemical  
 42 compositions of organic compositions (green), nitrate (blue), sulfate (red), ammonium (orange), and chlorine  
 43 (purple), (d) SO<sub>2</sub> (black) and NO<sub>x</sub> (orange), and (3) O<sub>3</sub> (black) and PM<sub>2.5</sub> (orange) during the measurement  
 44 conducted at LJ. The filled colors in the panel (a) represent the wind directions.

45

46 **6 Comparison between the number concentrations of BC and mass concentration of the**  
47 **OA.**

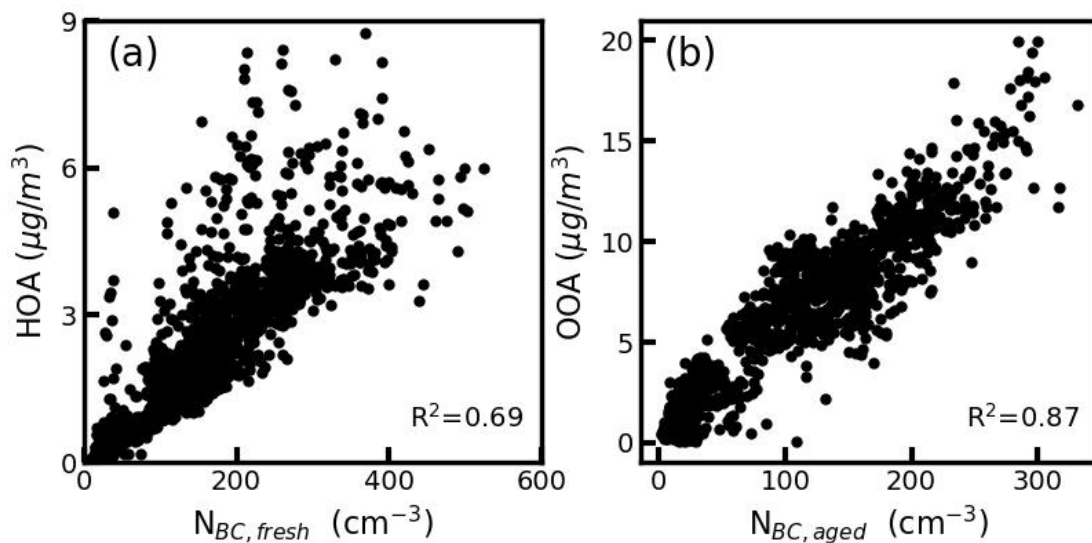

48  
49 **Fig. S6.** Comparison between (a) the number concentrations of the fresh BC and the mass  
50 concentrations of HOA, and (b) the number concentrations of the aged BC and the mass  
51 concentrations of OOA.
